# Supplementary material
Source: PubMed Central journal article supplement (PMC7158888)
Supplement: NIHMS1568289-supplement-Supplemental_Information.pdf [file NIHMS1568289-supplement-Supplemental_Information.pdf]

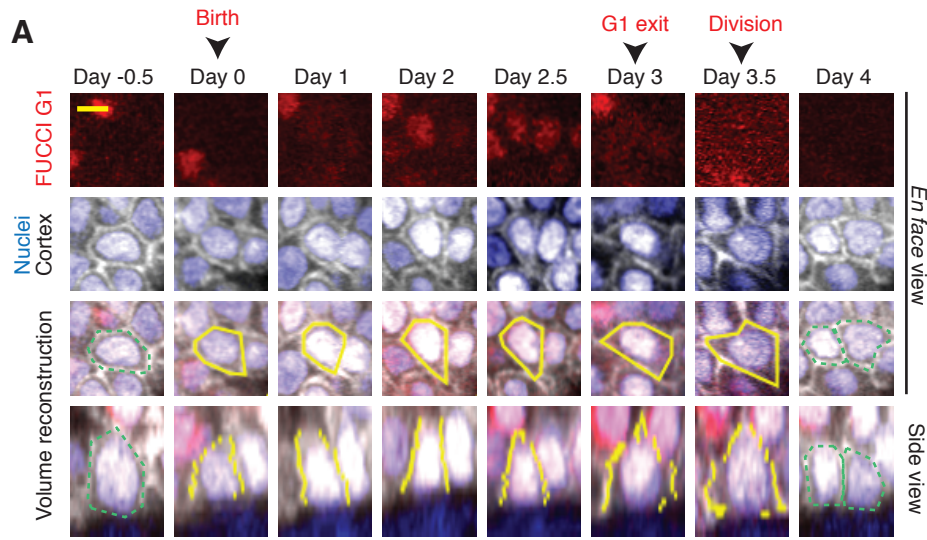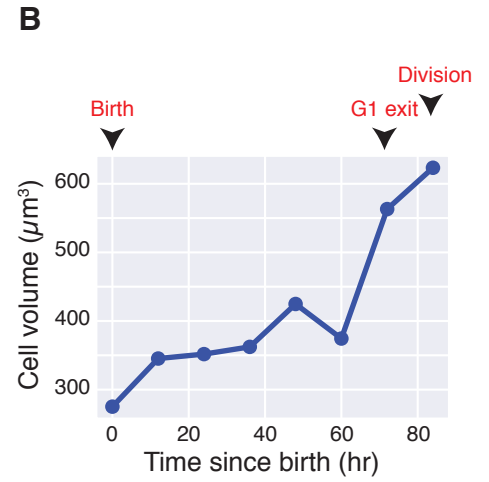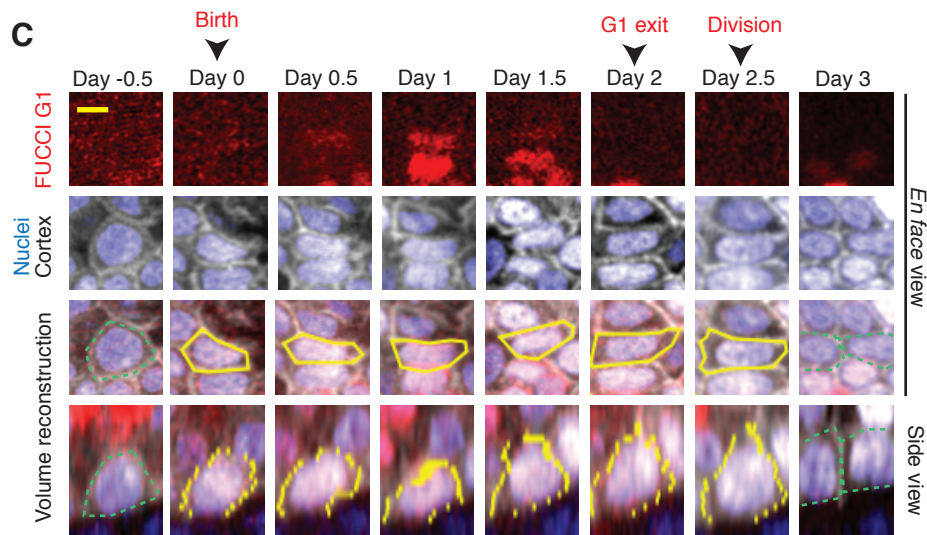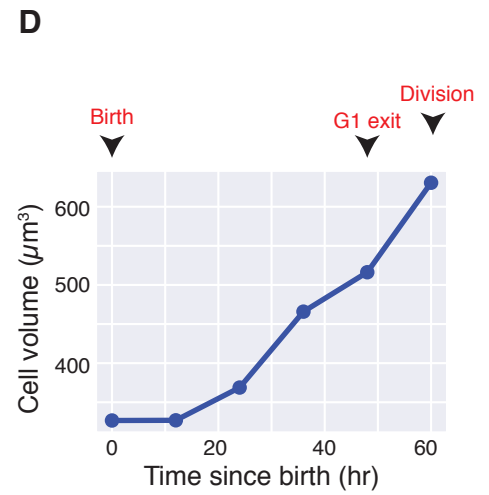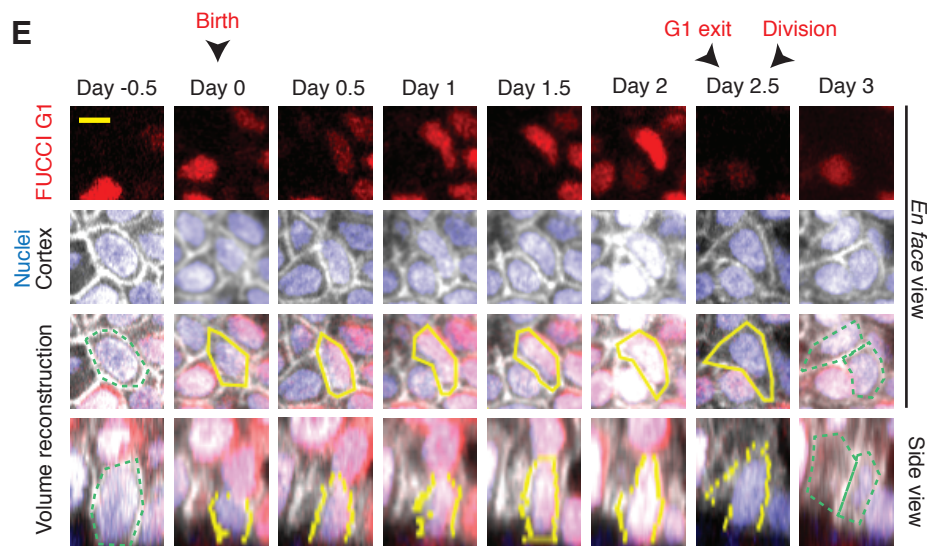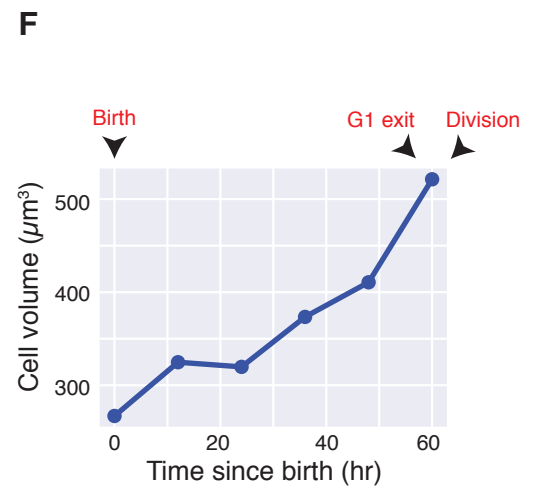

**Figure S1. Examples of 3D reconstruction of epidermal stem cells. Related to Figure 1.**

A-F. Three examples of the volume reconstruction of single epidermal stem cells. The FUCCI-G1 reporter is shown in red, the nucleus in blue, and the actin cortex in gray. The manually segmented cell outlines are shown in yellow on top of the merged images showing *en face* and side views. The cell cycle landmarks birth, G1 exit, and division are annotated. The parent cell and daughter cells are outlined in dotted green. The volume growth curve is quantified for the cells shown in their respective neighboring panels.

Scale bars are 5  $\mu\text{m}$ .

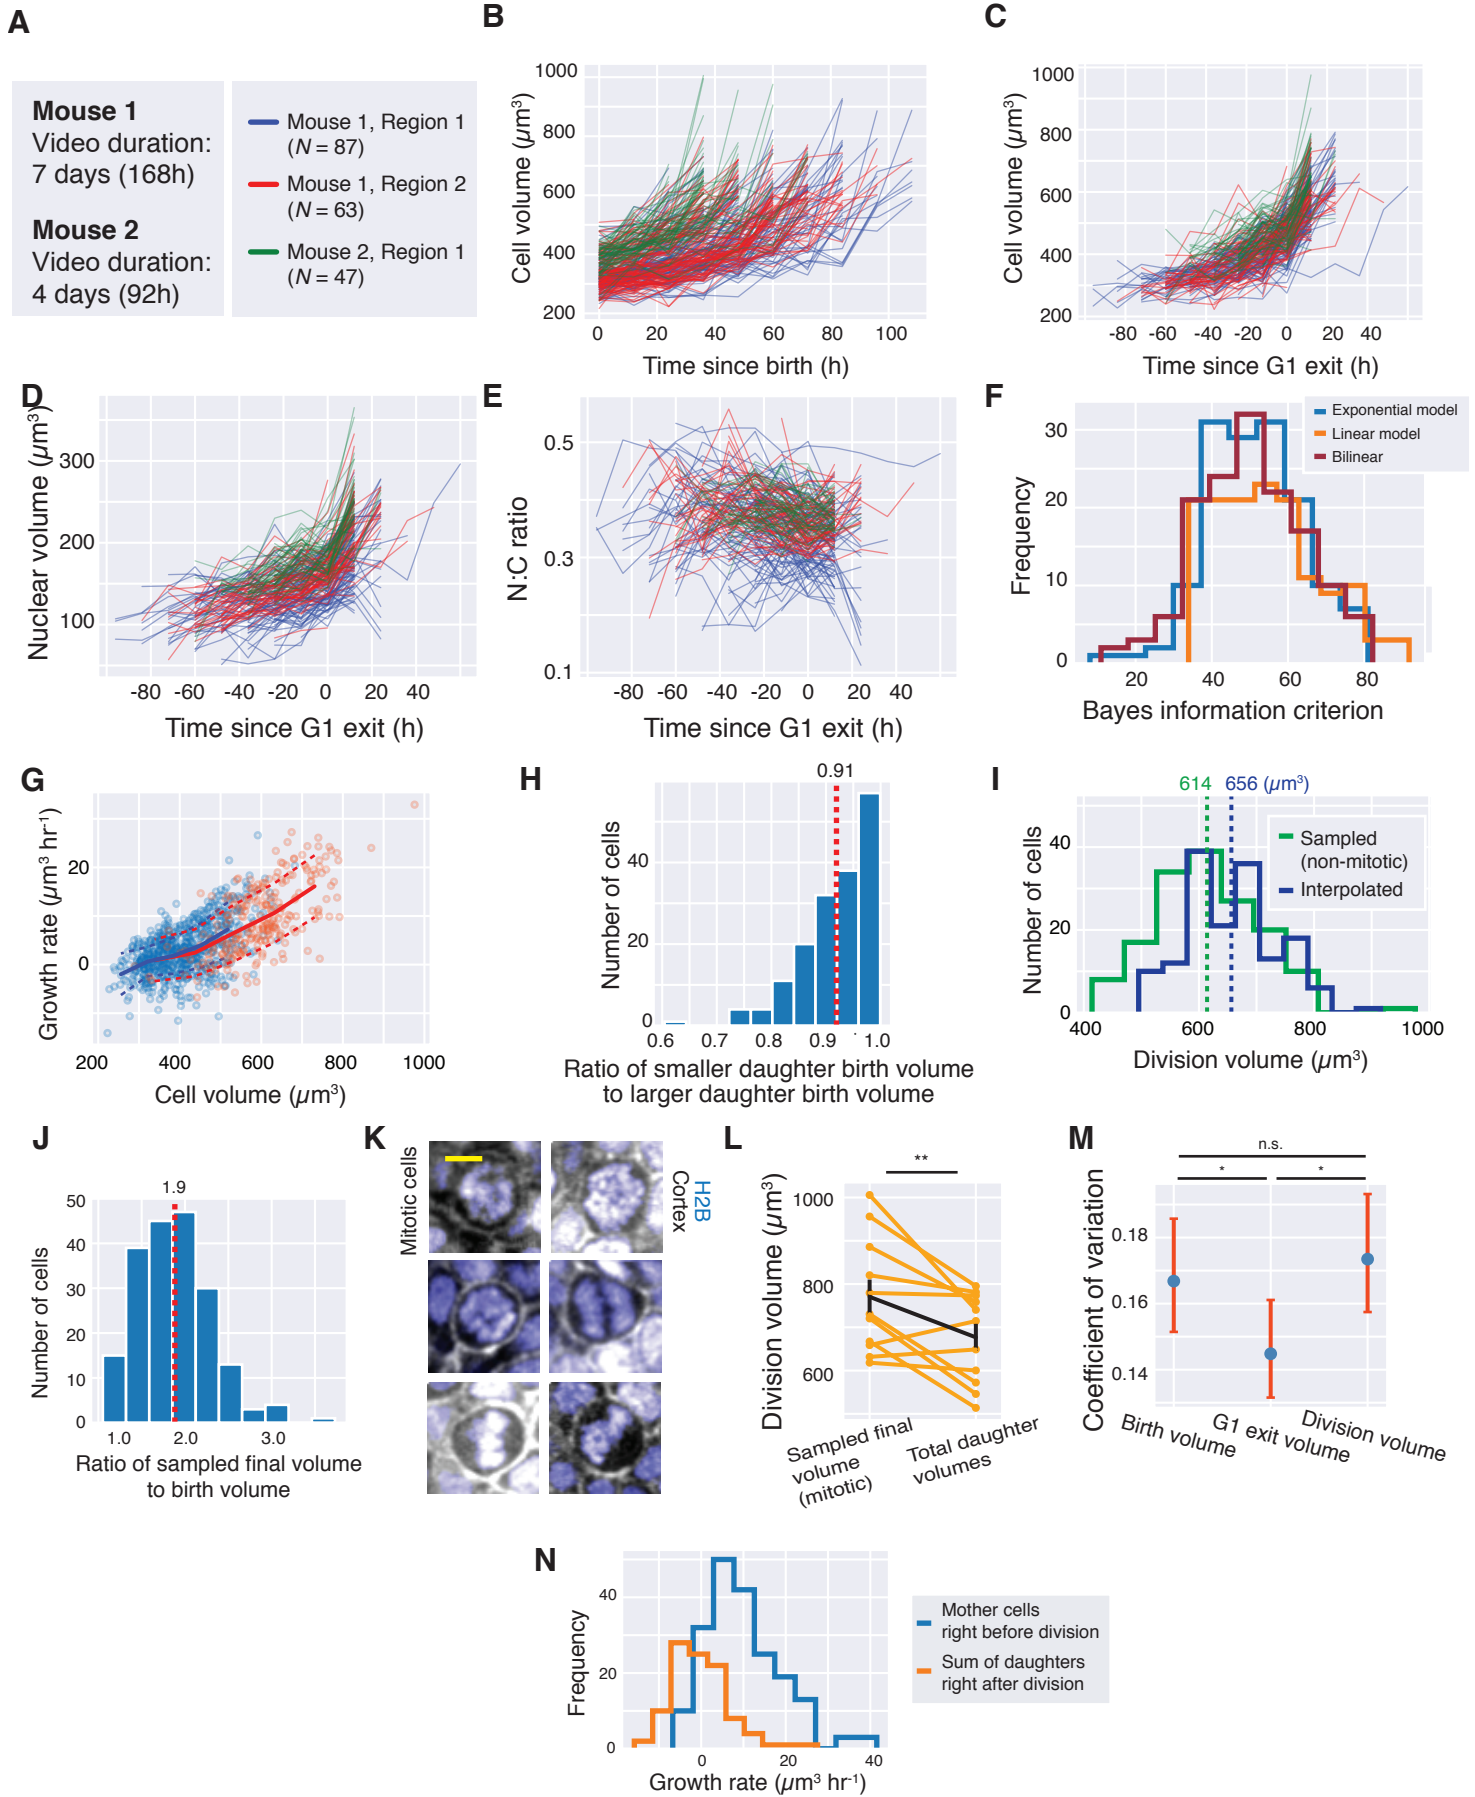

**Figure S2. Epidermal stem cell growth dynamics *in vivo*. Related to Figure 2.**

A. Summary of the multiple skin regions used in this study. Two regions were analyzed from mouse 1, which was imaged for 7 days. One region was analyzed from mouse 2, which was imaged for 4 days.

B. Volume growth curves aligned by birth ( $N = 197$ ). Each independent region is as indicated in (A).

C. Volume growth curves aligned by G1 exit.

D. The nuclear volumes aligned by G1 exit ( $N = 197$ ).

E. The N:C volume ratios are plotted with respect to time and aligned by G1 exit.

F. The volume growth rate (backwards differences) is plotted against cell volume, both estimated from unsmoothed data ( $N = 946$ ). Blue dots denote G1 cells, orange dots denote S/G2 cells. Binned means are shown in blue (G1) and orange (S/G2). Dotted lines show standard deviations.

G. The ratio of the birth volume of the smaller daughter cell to its larger sister cell ( $N = 167$ ). Dotted line denotes the median.

H. The distribution of the sampled final volume (green) and the interpolated division volume (blue) are shown for cells whose last frame is not during mitosis. Dotted lines denote the means for the distribution of corresponding color.

I. The distribution of the ratio between the sampled final volume to birth volume. Dotted line denotes the mean.

J. Examples of mitotic cells. The histone reporter is shown in blue. The actin cortex is shown in gray. Scalebar is  $5\mu\text{m}$ .

K. The differences between the sampled final volume and the interpolated division volume are shown for cells that are in mitosis in their last frame ( $N = 11$ ). Black line denotes the mean. Cells in mitosis are larger than the sum of the two daughter cell volumes. (\*\*: one-tailed paired T-test,  $P < 0.01$ ).

L. The CV of cell volume at cell birth, G1 exit, and cell division.  $N = 197$ . Error bars show the 95% confidence interval estimated using bootstrapping. (\*:  $P < 0.05$ , n.s.:  $P > 0.5$ ; one-tailed bootstrap test).

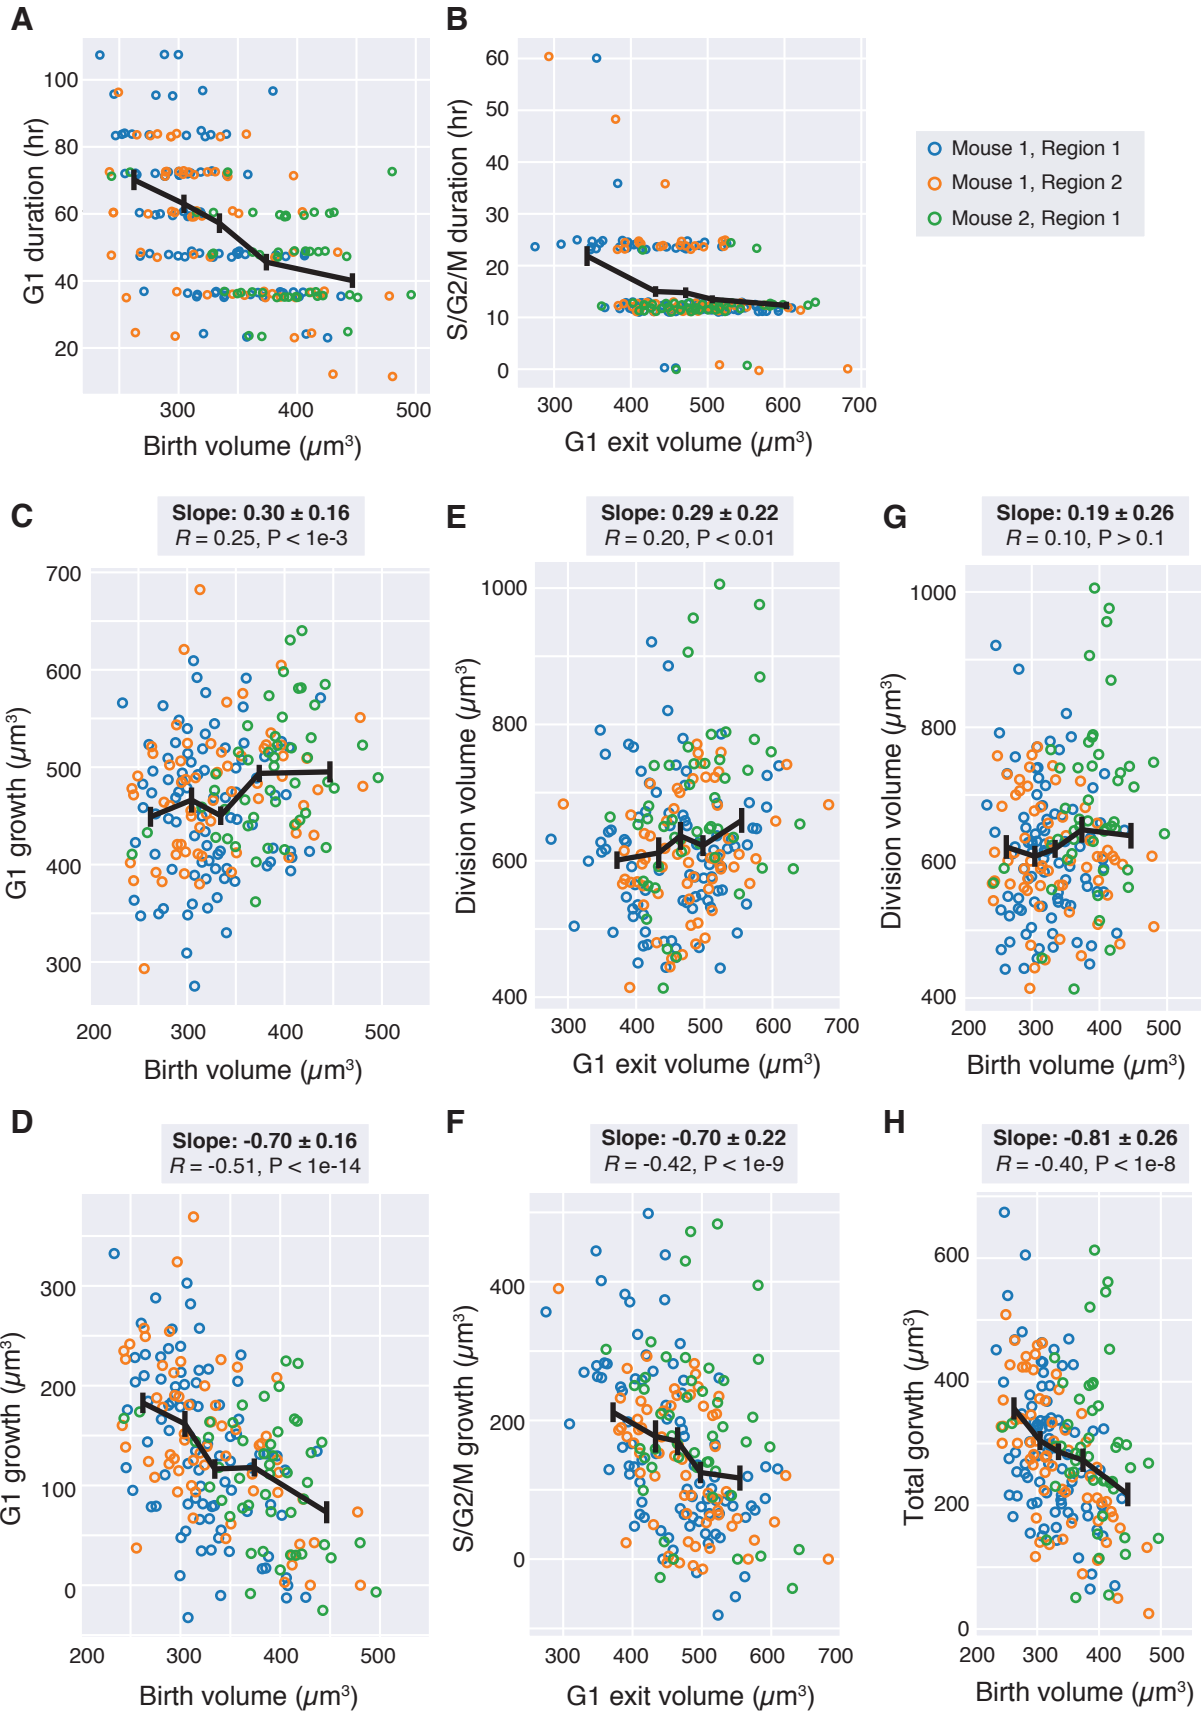

**Figure S3. Cell size control correlations showing unsmoothed data from individual regions. Related to Figure 3.**

A. Cell birth volume is plotted against the duration of the G1 phase. Cells from each individual region are shown in different colors.

B. The volume at which cells exit G1 is plotted against the duration of S/G2/M phases.

C-D. Birth volume is plotted against the volume at G1 exit (C) or the amount of growth during G1 (D).

E-F. The G1 exit volume is plotted against the volume at division (E) or the amount of growth during S/G2/M (F).

G-H. The birth volume is plotted against the division volume (G) or the total amount of growth (H).

All data are unsmoothed and contain no daughter volume interpolation. Black lines show binned means  $\pm$  SEM. Slopes reported correspond to the slope of the linear regression and 95% confidence intervals.  $R$  values are Pearson's correlations, with  $P$ -values reported against the null-hypothesis of  $R = 0$ . We note that not using smoothed data leads to the same qualitative conclusions as using smoothed data.

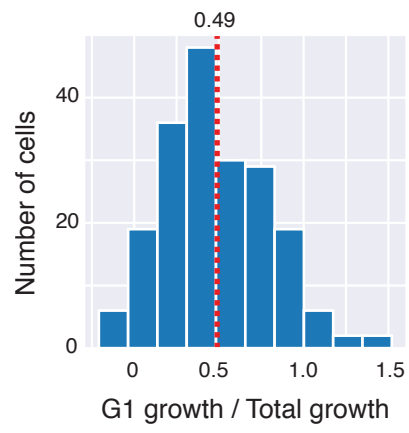

**Figure S4. The distribution of the ratio between growth during G1 over total growth. Related to Figure 4.  $N = 167$ , dotted line denotes the mean.**
